# Supplementary material for: Modeling the tyrosine–sugar interactions in supersonic expansions: glucopyranose–phenol clusters
Source: Royal Society of Chemistry journal article supplement (doi:10.1039/c6cp00560h), 2016-01-01
Supplement: c6cp00560h1.pdf [file c6cp00560h1.pdf]

**Supporting information for:**

**Modeling the Tyrosine-Sugar Interactions in Supersonic  
Expansions: The Glucopyranose-Phenol Clusters**

*Imanol Usabiaga, Jorge González, Pedro F. Arnáiz, Iker León, Emilio Cocinero and José A. Fernández\**

Dep. of Physical Chemistry, Fac. of Science and Technology, University of the Basque Country  
(UPV/EHU), Barrio Sarriena, s/n, 48940 Leioa, Spain

\*Corresponding Author:

José A. Fernández, [josea.fernandez@ehu.es](mailto:josea.fernandez@ehu.es)

phone: +34946015387

fax: +34946013500

web: <https://sites.google.com/site/gesemupv/>

**Figure S1.** Gibbs free energy of the 12 most stable conformers (six alpha and six beta anomers) of methyl-D-glucopyranose, relative to the most stable structure. The structure of the 12 species is depicted below, with the structural differences highlighted.

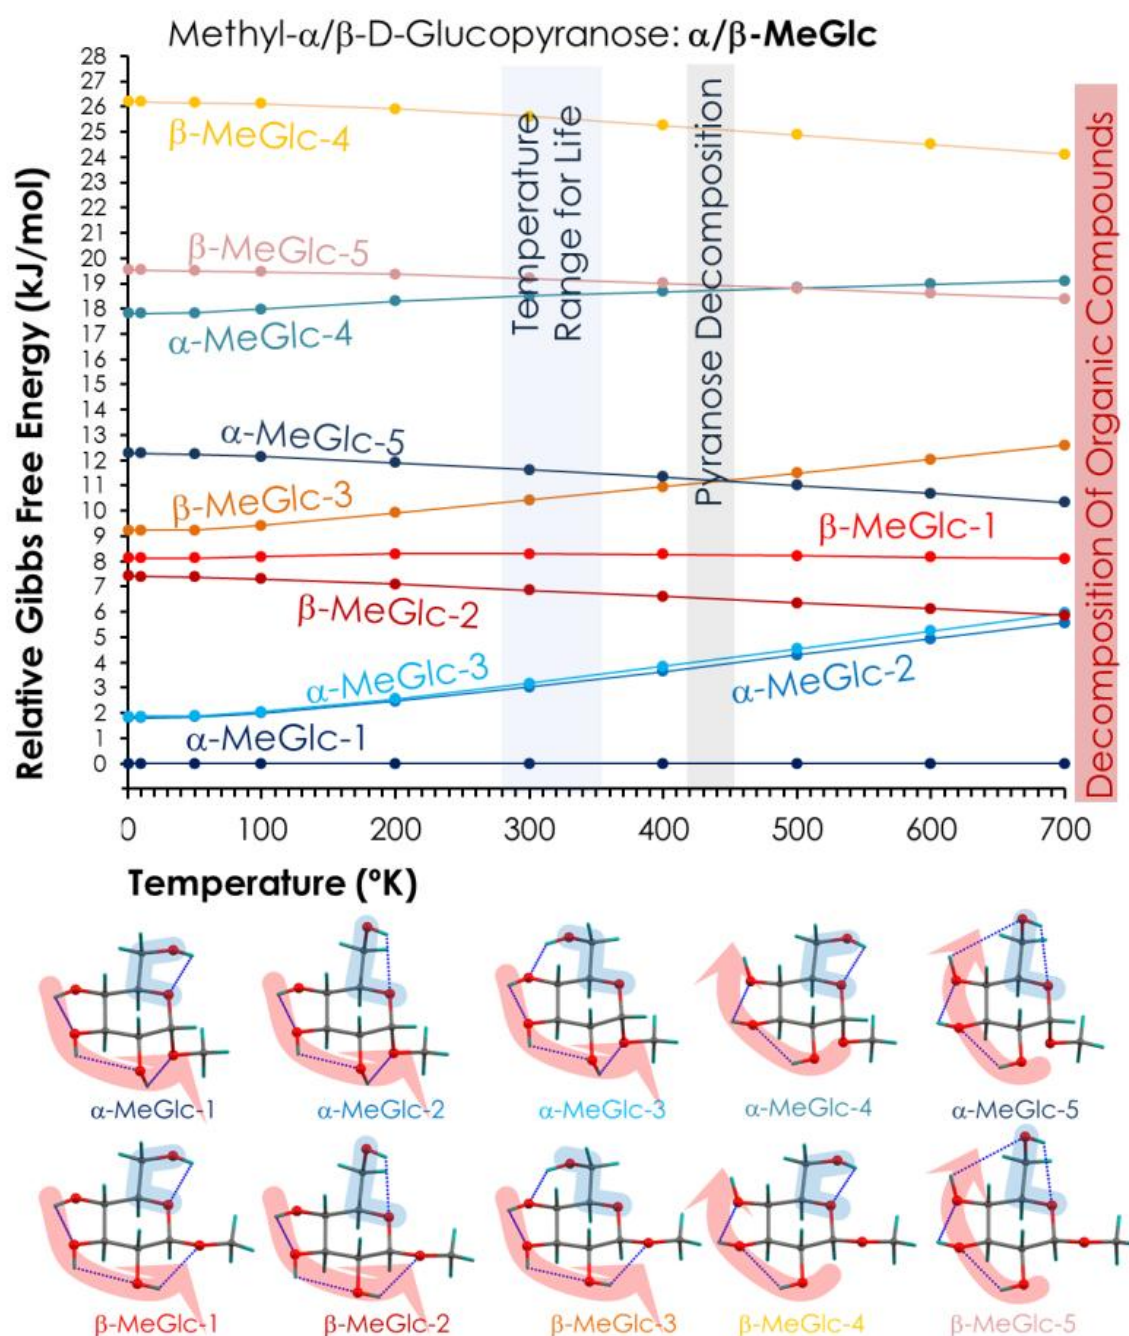

**Figure S2.** REMPI spectra of phenol,  $\beta$ -phenyl-D-glucopyranose ( $\beta$ -PhGlc),  $\alpha$ -methyl-D-glucopyranose...phenol ( $\alpha$ -MeGlc·Ph),  $\beta$ -methyl-D-glucopyranose...phenol ( $\beta$ -MeGlc·Ph) and  $\beta$ -phenyl-D-glucopyranose...phenol ( $\beta$ -PhGlc·Ph) in the 36100-37100 region.

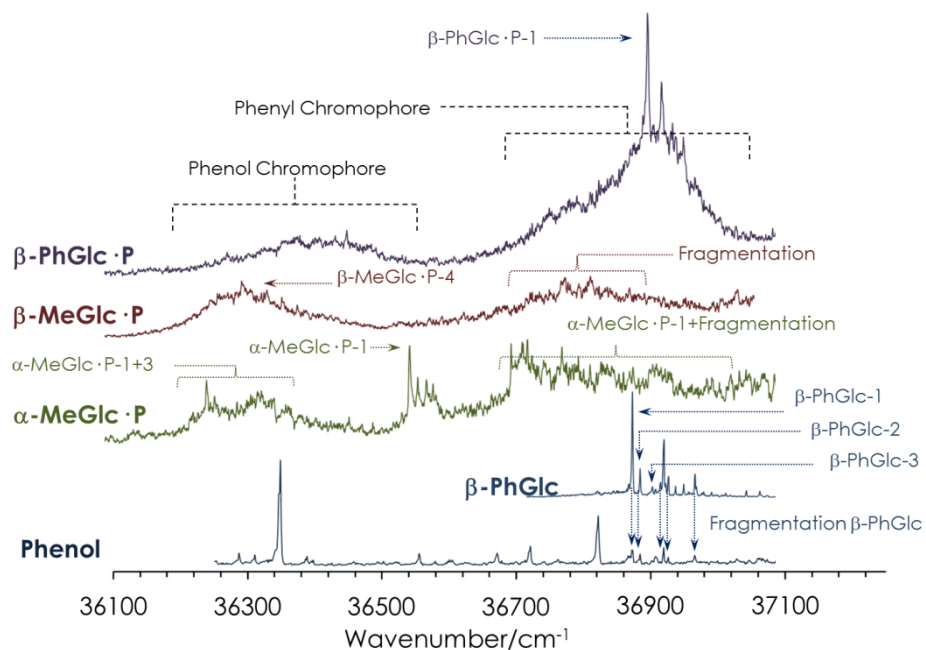

**Figure S3.** Six most stable structures of  $\beta$ -phenyl-D-glucopyranose, with the values of the dihedral angles for each of the structures

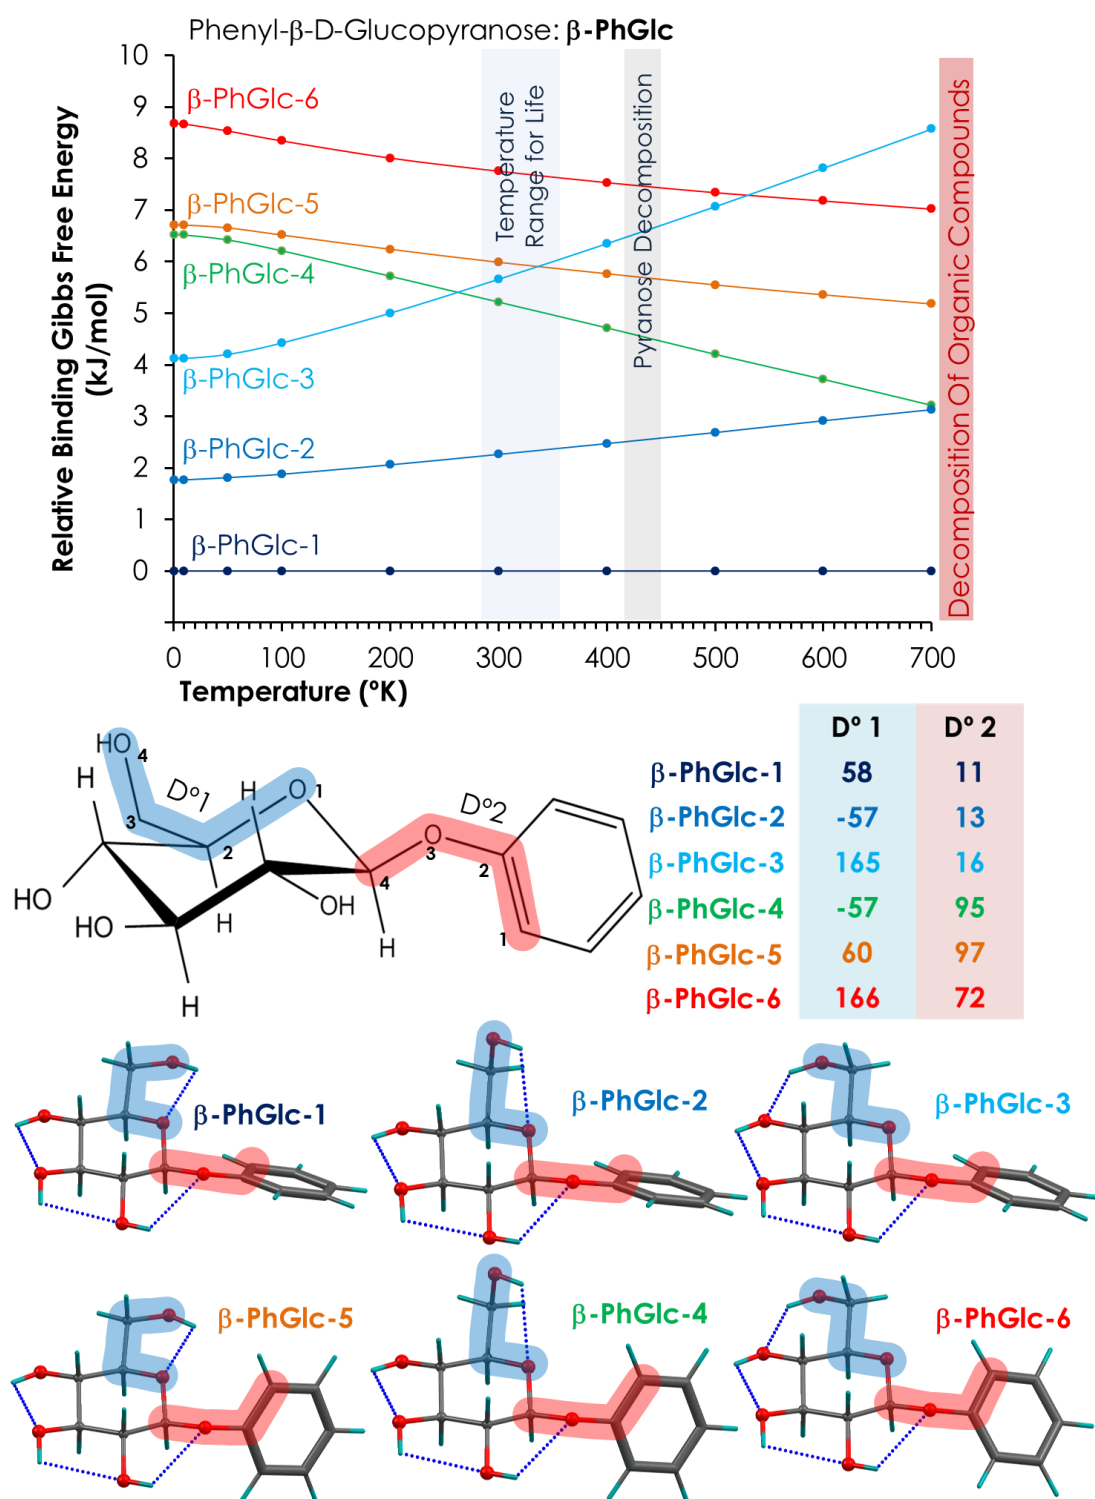

**Figure S4.** IR/UV spectra of  $\alpha$ -MeGlc·Ph obtained probing the REMPI spectrum of the complex at different UV wavelengths.

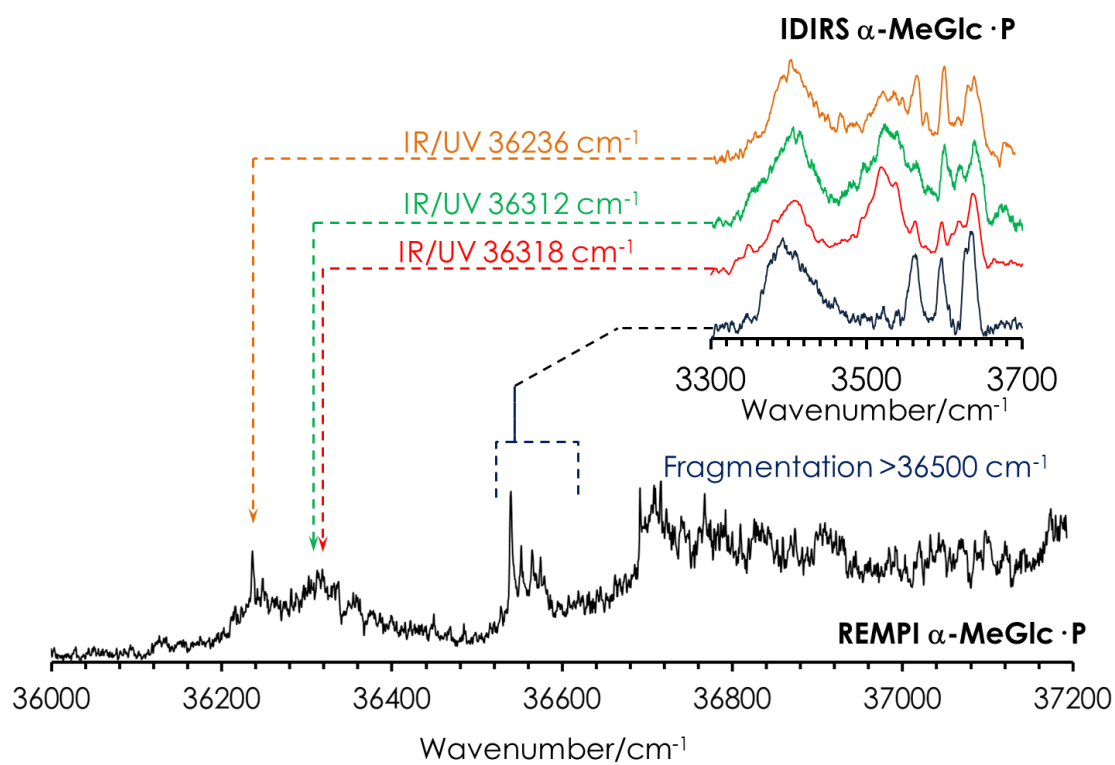

**Figure S5.** IR/UV hole burning of  $\alpha$ -MeGlc·Ph obtained probing two different IR transitions. The REMPI spectra obtained are significantly different, demonstrating the existence of at least two conformers.

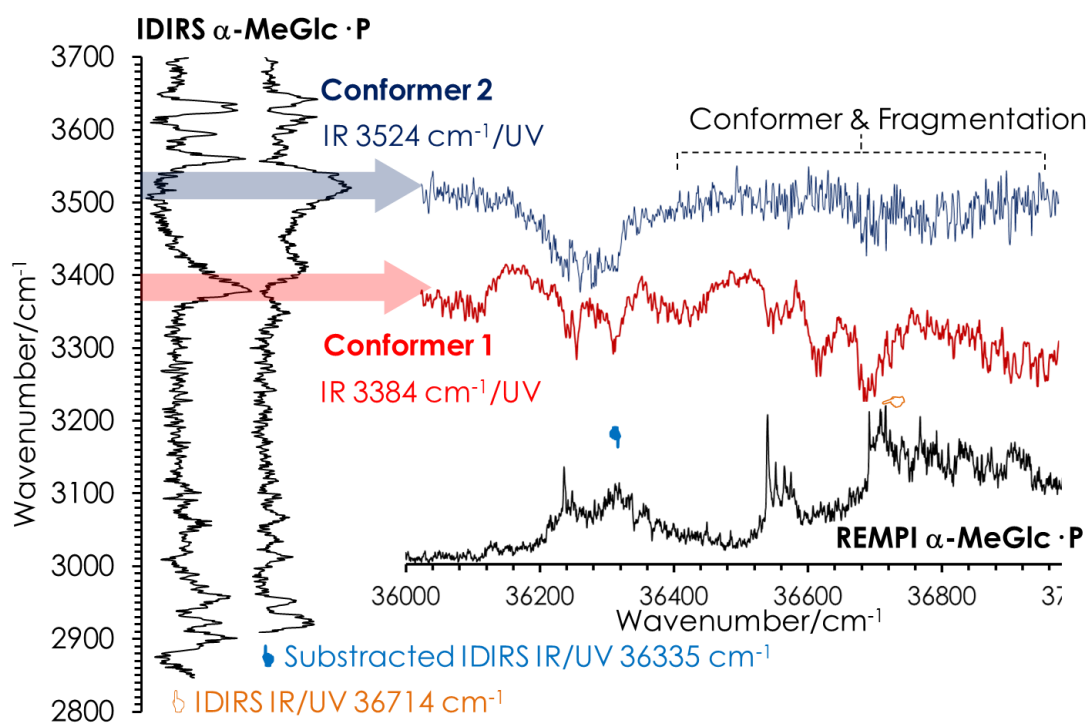

**Figure S6.** IR/UV hole burning of  $\beta$ -MeGlc·Ph obtained probing two different IR transitions. The differences in the REMPI spectra are mainly due to fragmentation, and therefore it seems that a single isomer is present.

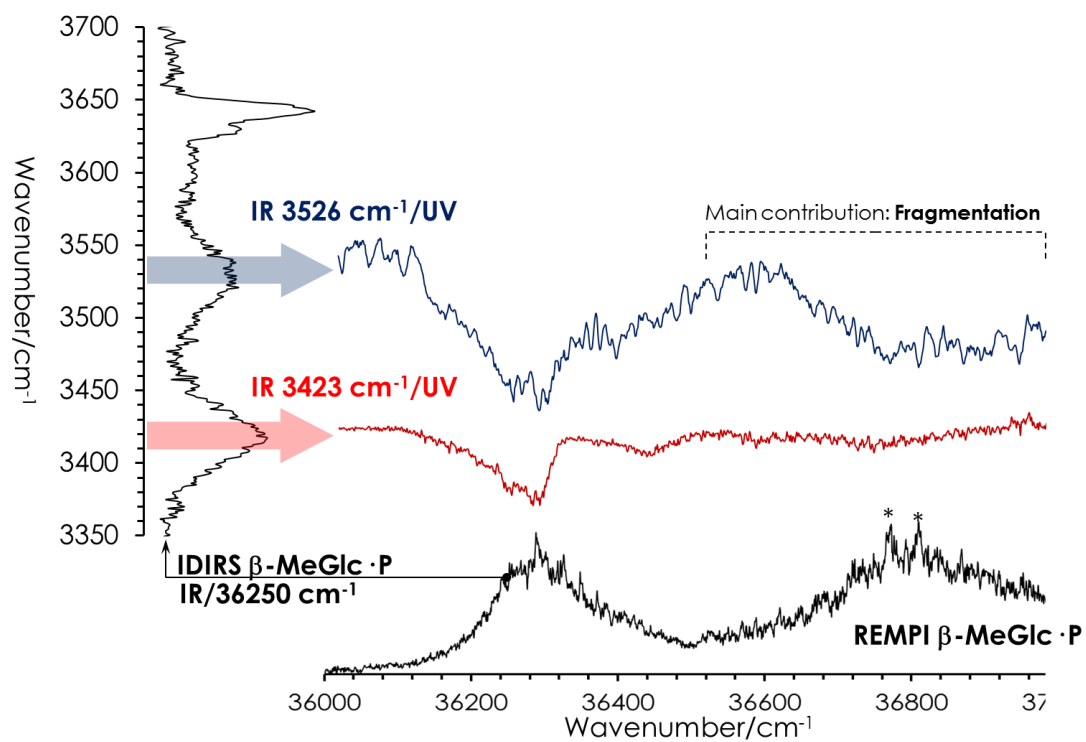

**Figure S7.** IR/UV spectra of  $\beta$ -PhGlc·Ph obtained probing the REMPI spectrum of the complex at different UV wavelengths. The fragmentation from  $\beta$ -MeGlc· $\beta$ -PhGlc appears in the IR trace of the  $\beta$ -MeGlc·P complex, indicating that the IR laser triggers a complex fragmentation mechanism in the  $\beta$ -MeGlc· $\beta$ -PhGlc complex.

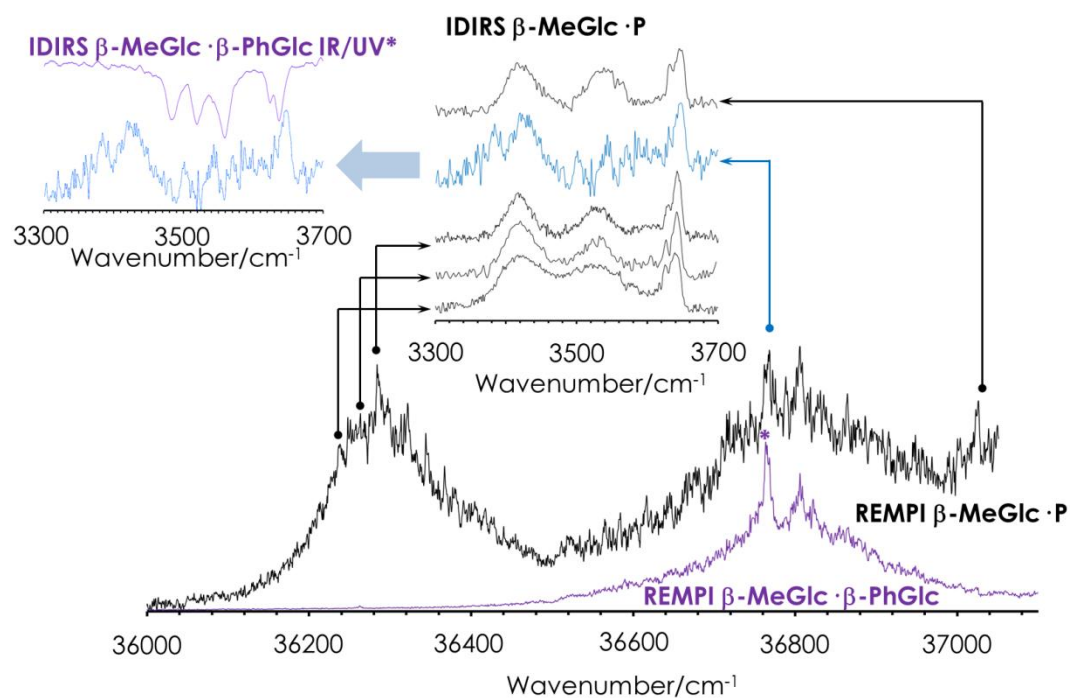



**Figure S8.** UV/UV hole burning of  $\beta$ -PhGlc·Ph obtained tuning the depopulation laser at 36892  $\text{cm}^{-1}$ . The differences with the REMPI spectrum are due to interferences with the bare molecule that produces a very strong signal. The experiment points to the existence of a single isomer.

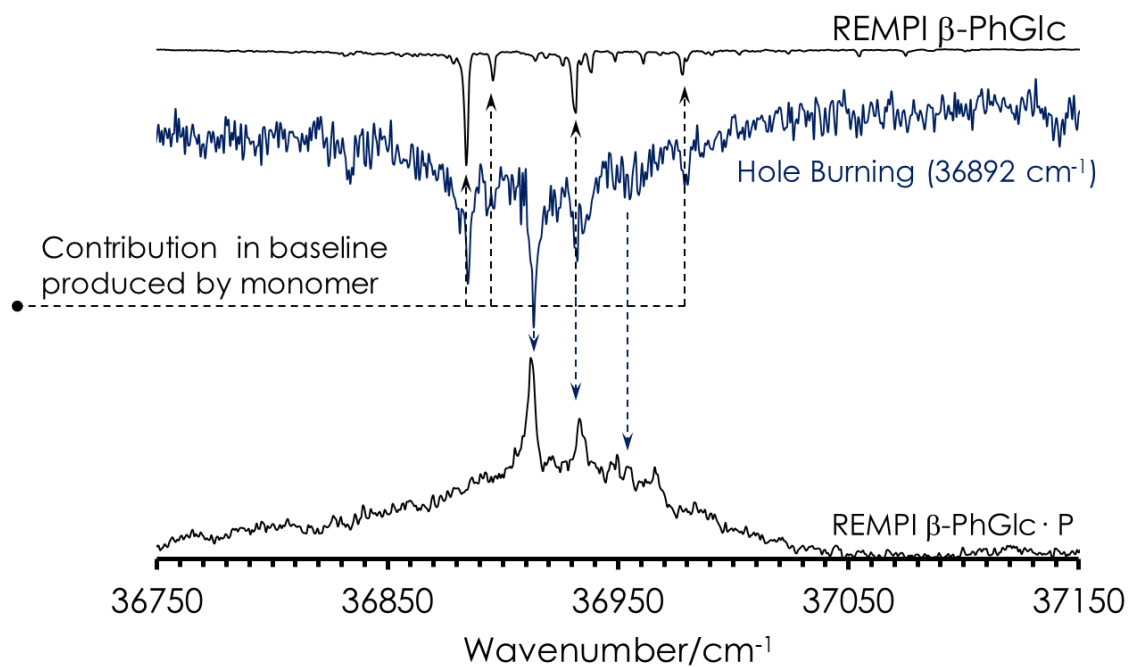

**Figure S9.** Comparison between the IR/UV spectra of all the species detected with the simulated spectra for the calculated structures to which they have been assigned.

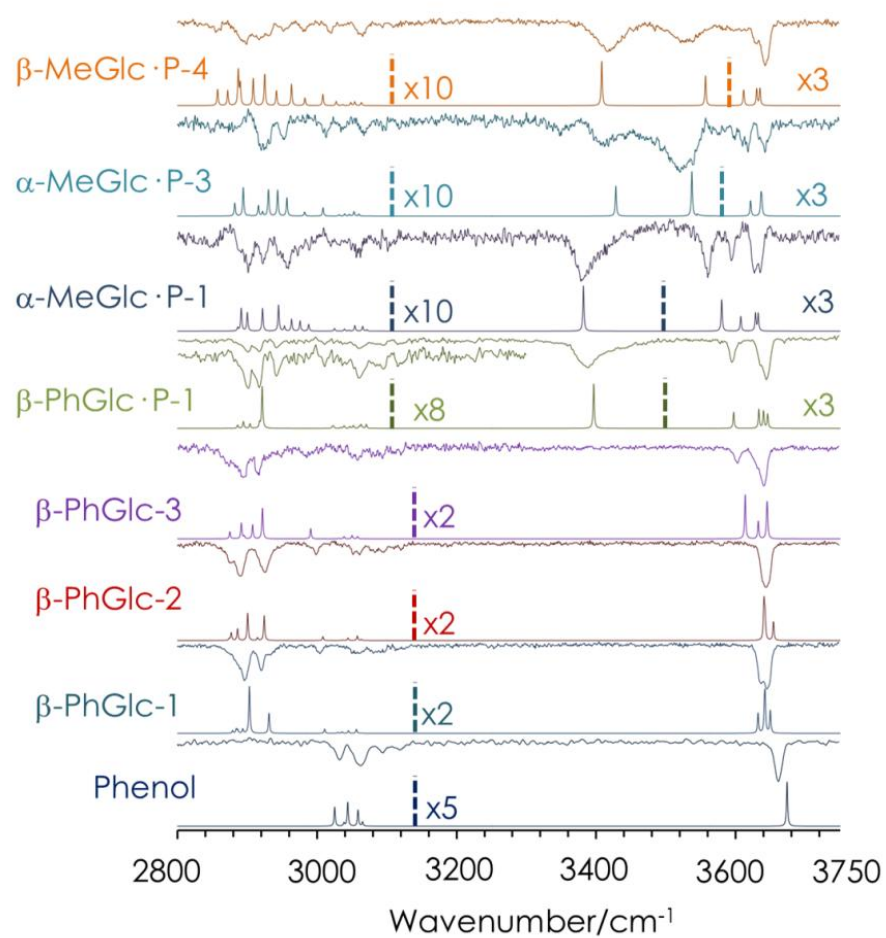

**Figure S10.** The 20 most stable structures of  $\alpha$ -MeGlc  $\cdot$  Ph calculated at M06-2X/6-31+G(d) level together with their relative stability (kJ/ mol) and Gibbs relative energies (kJ/ mol) in brackets. ZPE correction was applied to all energy values.

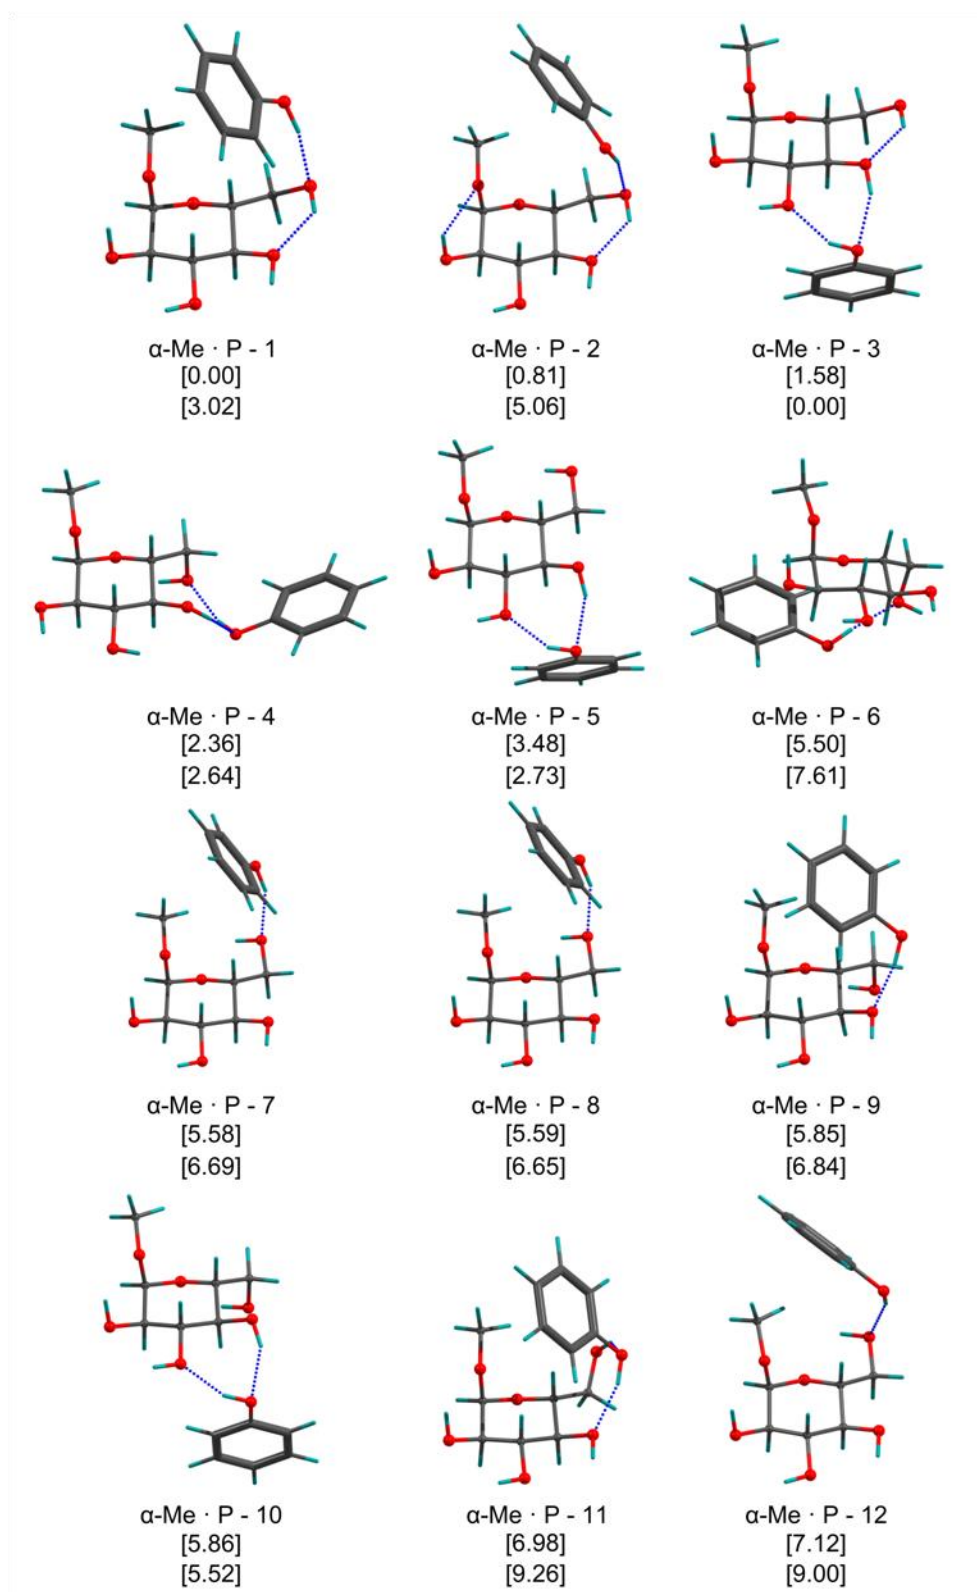

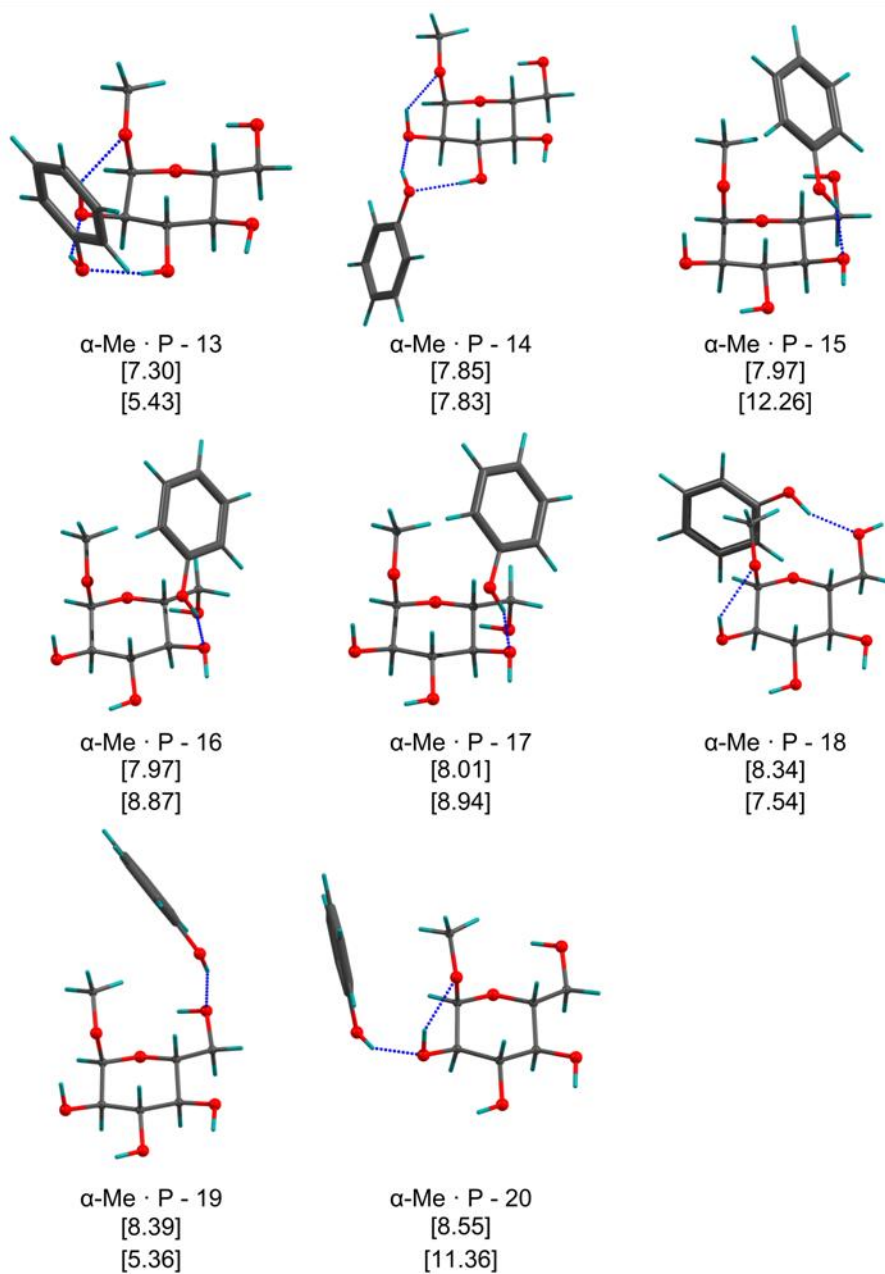

**Figure S11.** The 20 most stable structures of  $\beta$ -MeGlc  $\cdot$  Ph calculated at M06-2X/6-31+G(d) level together with their relative stability (kJ/mol) and Gibbs relative energies (kJ/mol) in brackets. ZPE correction was applied to the energy values.

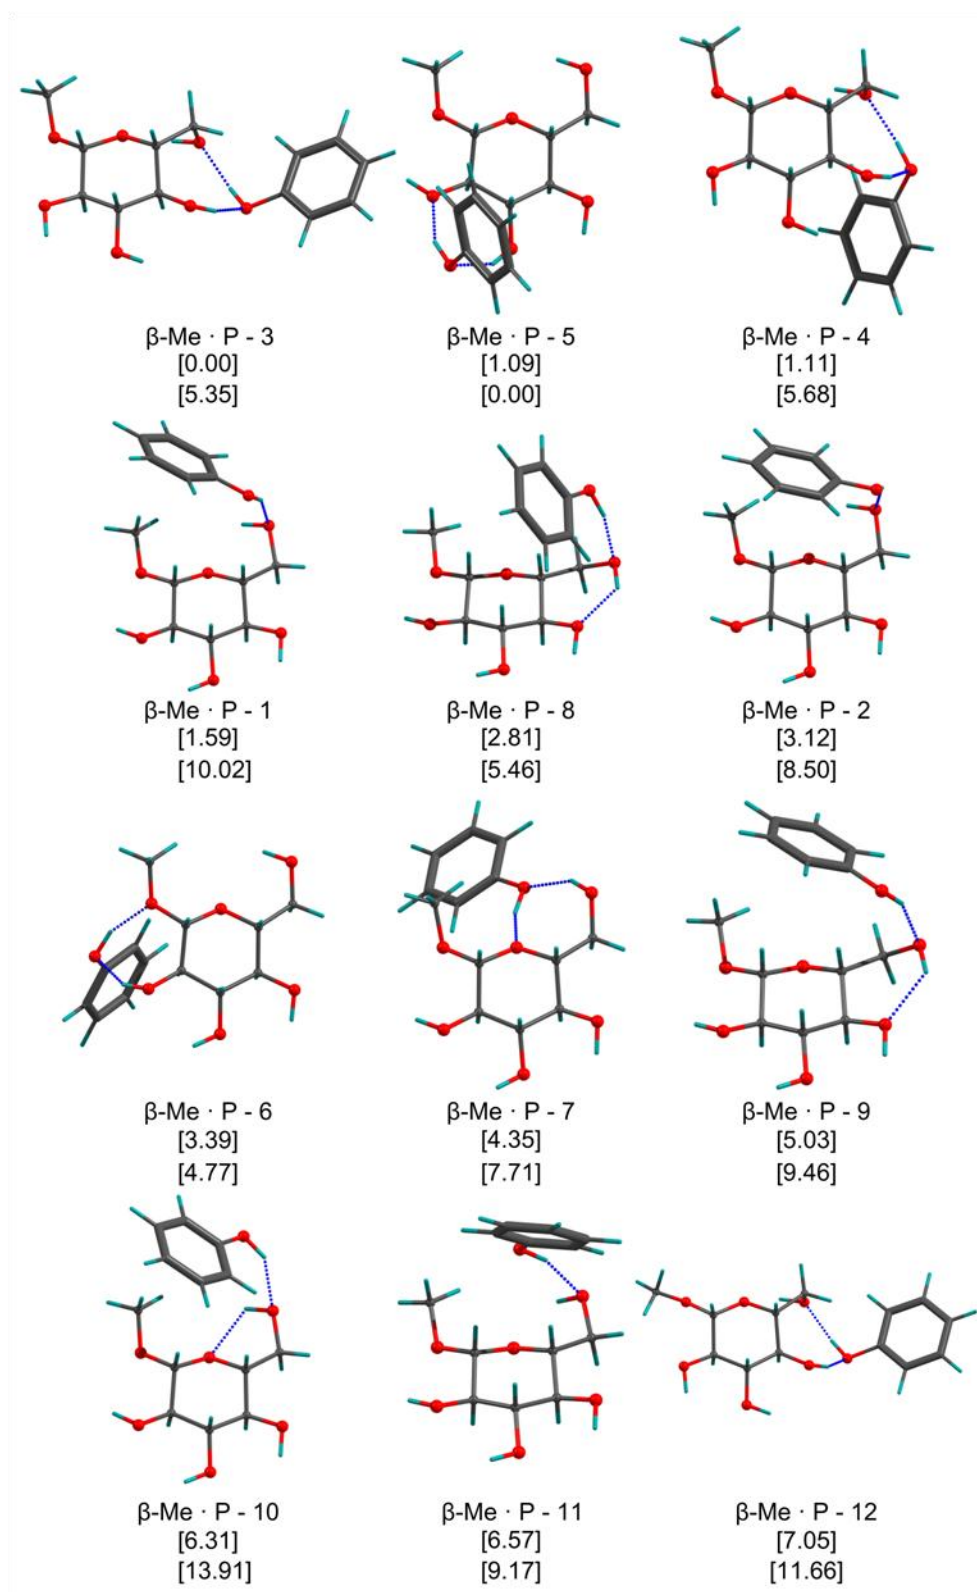

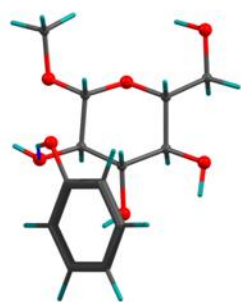

$\beta$ -Me · P - 13  
[7.41]  
[11.69]

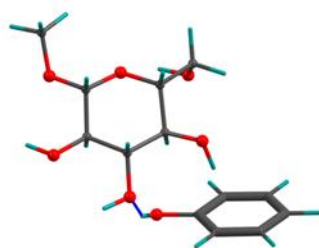

$\beta$ -Me · P - 14  
[7.51]  
[13.03]

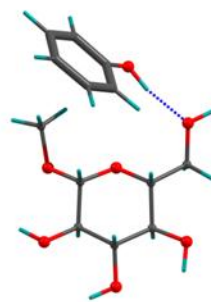

$\beta$ -Me · P - 15  
[8.00]  
[17.37]

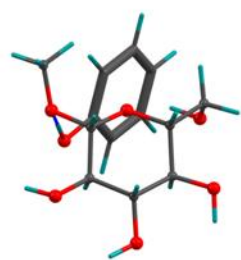

$\beta$ -Me · P - 16  
[8.30]  
[14.29]

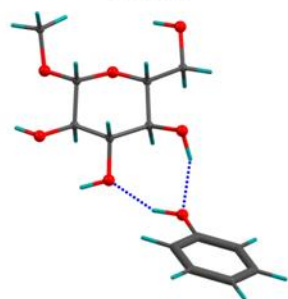

$\beta$ -Me · P - 17  
[8.99]  
[7.95]

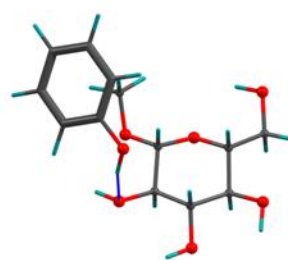

$\beta$ -Me · P - 18  
[9.09]  
[16.66]

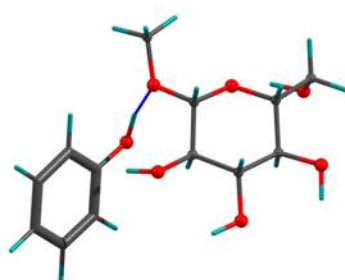

$\beta$ -Me · P - 19  
[9.29]  
[13.06]

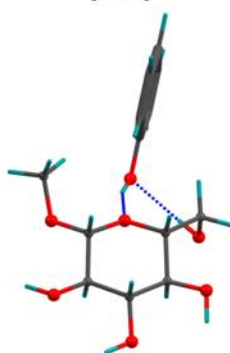

$\beta$ -Me · P - 20  
[9.44]  
[15.47]



**Figure S12.** The 20 most stable structures of  $\beta$ -PhGlc  $\cdot$  Ph calculated at M06-2X/6-31+G(d) level together with their relative stability (kJ/mol) and Gibbs relative energies (kJ/mol) in brackets. ZPE correction was applied to the energy values.

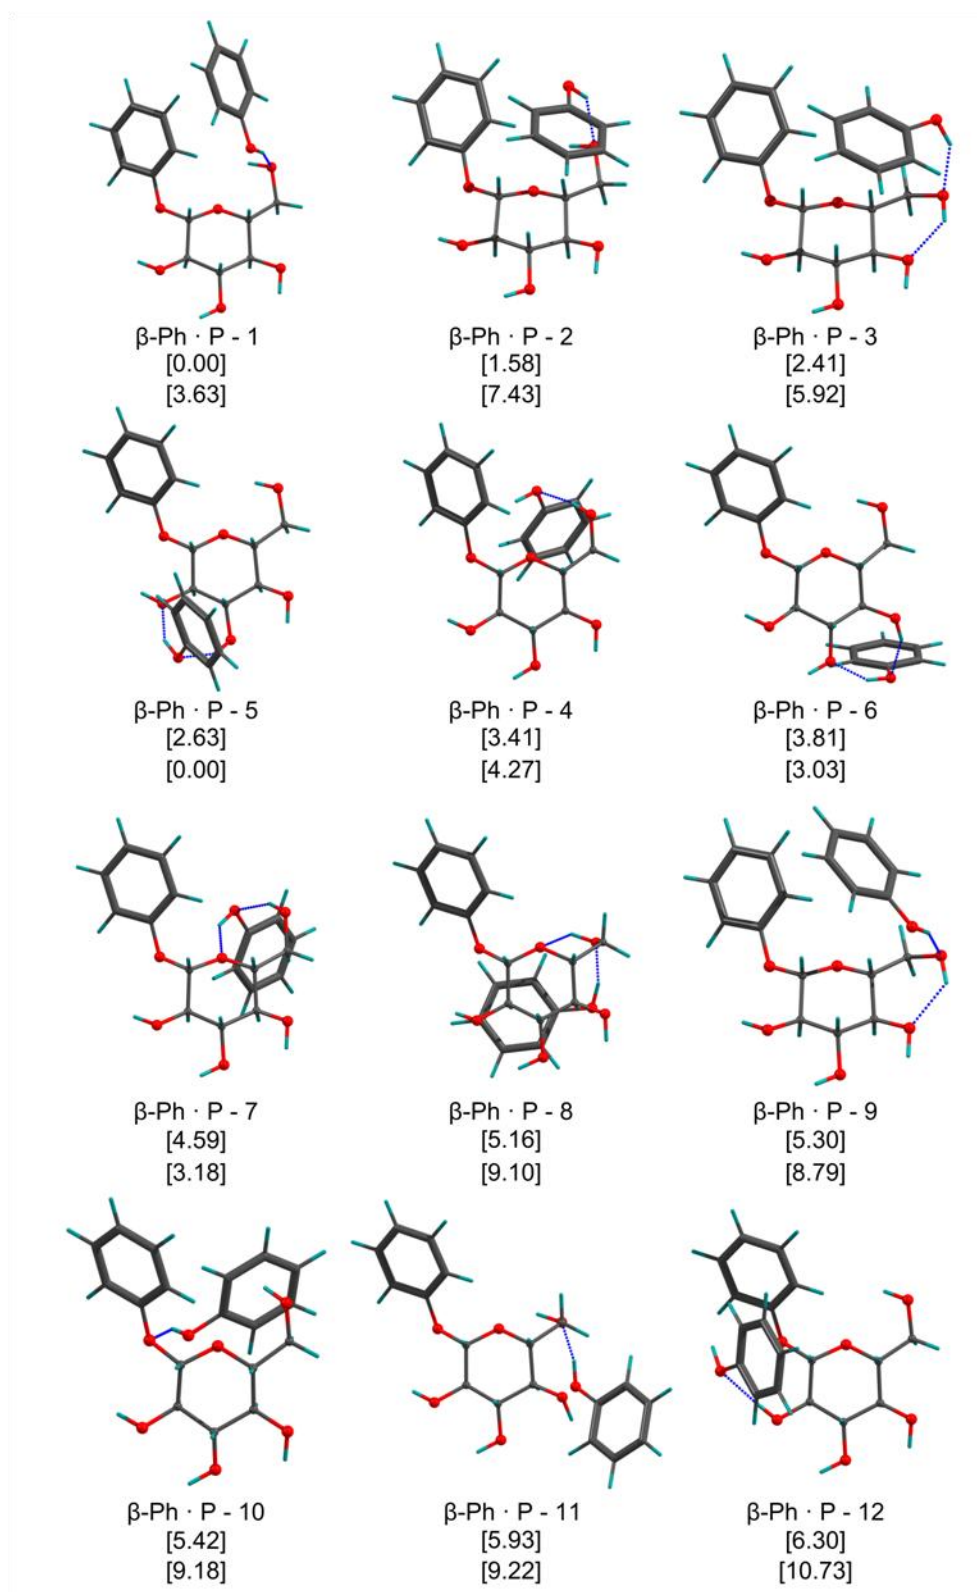

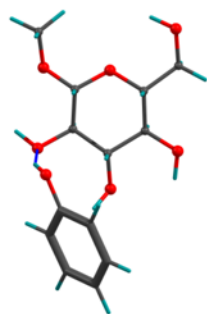

$\beta$ -Ph · P - 13  
[6.68]  
[5.38]

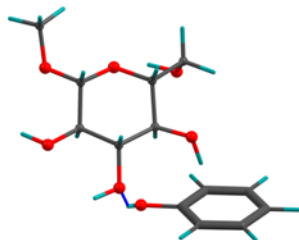

$\beta$ -Ph · P - 14  
[6.96]  
[6.03]

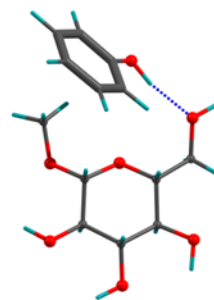

$\beta$ -Phe · P - 15  
[7.11]  
[5.49]

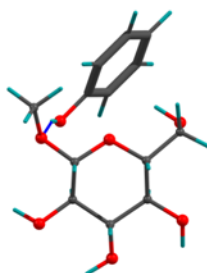

$\beta$ -Ph · P - 16  
[9.39]  
[15.83]

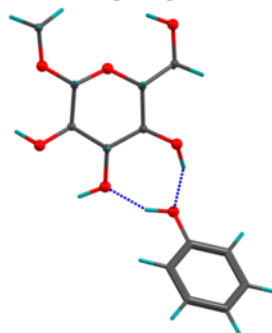

$\beta$ -Ph · P - 17  
[11.24]  
[16.30]

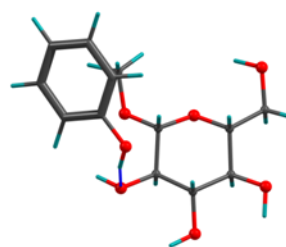

$\beta$ -Ph · P - 18  
[12.26]  
[9.28]

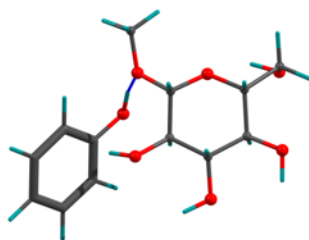

$\beta$ -Ph · P - 19  
[12.40]  
[16.12]

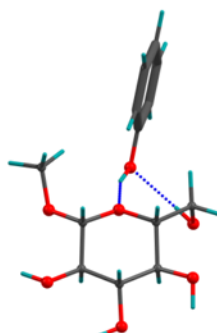

$\beta$ -Ph · P - 20  
[12.44]  
[13.35]
